# Supplementary material for: Developing a quality evaluation indicator system for lung cancer diagnosis and treatment: a modified delphi method study
Source: Research Square preprint supplement (doi:10.21203/rs.3.rs-6166642/v1), 2025-04-17
Supplement: Supplementary file 1 [file bf71258b71032fc05a4a156e.docx]

**First Round Delphi Expert Consultation Questionnaire**

**Construction of a Quality Evaluation Indicator System for Lung Cancer Diagnosis and Treatment in China**

Dear Expert,

Given your extensive expertise in the field of oncology, we sincerely invite you to participate in this expert consultation.

We are currently conducting research on the "Construction of a Quality Evaluation Indicator System for Lung Cancer Diagnosis and Treatment in China." The aim of this study is to develop a set of quality evaluation tools for lung cancer diagnosis and treatment in China. These tools will be used to conduct an empirical investigation into the standardization level of lung cancer diagnosis and treatment, with the goal of identifying key quality issues and supporting hospitals in implementing quality improvement measures.

Our research team has extensively reviewed domestic and international literature, quality control indicators, and evaluation methods from relevant organizations and institutions. We have also thoroughly studied China's standardized lung cancer diagnosis and treatment quality control indicators, as well as the performance evaluation indicators for national tertiary public hospitals. Based on Donabedian's "Structure-Process-Outcome" three-dimensional model and the six dimensions of healthcare quality evaluation proposed by the Institute of Medicine (IOM)—safety, effectiveness, patient-centeredness, timeliness, efficiency, and equity—we have developed this questionnaire. Additionally, we applied the SMART principles (Specific, Measurable, Achievable, Relevant, and Time-bound) from health management performance evaluation theory as the criteria for selecting indicators. After summarizing and organizing the indicators from the literature review, we invited three industry experts to review and revise the questionnaire. This is the first round of the Delphi consultation, which will consist of 2–3 rounds.

The questionnaire consists of three parts:

1. Basic Information of the Expert

2. Opinion Survey on the Quality Evaluation Indicator System for Lung Cancer Diagnosis and Treatment

3. Survey on the Expert's Authority Level

We sincerely hope that you can complete this survey within one week (by October 18). The research team will statistically analyze your feedback, and all your information will be kept strictly confidential. We look forward to your response.

If you have any questions, please feel free to contact us.

Contact: Liming Shi

Email: 17287277@qq.com

Phone: 18612113950

National Cancer Center

Office of Cancer Diagnosis and Treatment Quality Control

October 10, 2024

**Part I. Basic information questionnaire for experts**

**Please fill in the information according to your own situation, and check the "□" box for the options you think fit. If you would like to go into more detail, please mark the blanks.**

1. Name.
2. Sex: □Male □Female
3. Age.
4. Province.
5. City.
6. Company:
7. Department:□Oncology □Medical Oncology □Respiratory □Thoracic Surgery □General Surgery □Nursing □Pathology □Imaging □Pharmacy □Medical Services □Other (please specify: )
8. Administrative position: □ President □ Vice President □ Head of Section □ Deputy Head of Section □ None □ Other (please specify: )
9. Title: □ Senior □ Associate □ Intermediate □ Junior □ Other (please specify: )
10. Highest Education: □ Specialized □ Bachelor □ Master □ Doctor □ Other (please specify: )
11. Research Direction:□Clinical □Medical Technology □Management □Scientific Research □Other (Please specify: )
12. Number of years you have worked in the field: years
13. Approximate amount of time you spend directly serving patients:.

□ None or <10% □ 10%-24% □ 25%-49% □ 50%-74% □ ≥75%

Phone: E-mail:

**Part II. The consultation form for lung cancer single-disease diagnosis and treatment quality evaluation system**

According to the latest Global Cancer Statistics 2022 (GLOBCAN2022) released by the International Agency for Research on Cancer (IARC), there will be about 20 million new cases worldwide in 2022, with lung cancer being the top cancer, accounting for 12.4% of the new cases. China accounts for 24.1% of the global new cases.

Cancer prevention and control in China is in a severe form, and cancer brings both physical and economic burdens to patients, so our government attaches great importance to cancer prevention and control. Meanwhile, medical quality and safety has always been the key work of China to deepen the reform of the medical and health system, and a series of policies have been issued since 2009. 2020, the General Office of the National Health Commission issued the Circular on Further Strengthening the Quality Management and Control of Individual Disease Types (State Health Office of the Medical Affairs Letter 〔2020〕 No. 624), which puts forward the construction of a medical quality management system based on the quality control indexes and evaluation system for the whole process of disease diagnosis and treatment. system for medical quality management.

Avedis Donabedian, an American scholar, proposed the concept of medical quality as "the ability to utilize reasonable methods (in all aspects of medical services) to achieve the desired goals (restoration of patients' physical and mental health and patient satisfaction)", and in 1986, for the first time, put forward a three-tier hierarchy theory of quality evaluation, i.e., structure, process, In 1986, the three-level theory of quality evaluation, namely structure, process, and outcome, was first proposed, and has been widely accepted by scholars both at home and abroad because of its simplicity, ease of understanding, and proximity to clinical practice. Structure is the resources used in the provision of medical services, including personnel, technology, instruments and medicines, and constitutes the basic conditions for quality. The various activities in medical services constitute the process, and the outcome is the reflection of the combined effect of structure and process, and is the change in the patient's health status caused by medical services.

The outline of "Healthy China 20230" plan proposes the goal of increasing the overall five-year cancer survival rate by 15% by 20230. In order to achieve this goal, it is crucial to improve the quality of oncology diagnosis and treatment. On the basis of literature research and expert interviews, the present study developed a framework for evaluating the quality of lung cancer diagnosis and treatment for a single disease, and a pool of candidate indicators based on the principles of "specific, measurable, accessible, goal-oriented, and timely".

Please rate the "importance" and "accessibility" of each indicator candidate.

Importance was rated on a 9-point scale (1-9), with 1 indicating that the entry was very unimportant for measuring the quality of care and 9 indicating very important. The visual scale is as follows.

1 2 3 4 5 6 7 8 9

Very unimportant. - Very important

The evaluation of feasibility is based on a dichotomous "yes/no" assessment. If you think that the listed indicators can be obtained through corresponding surveys or inspections, the "feasibility" will be judged as "Yes" (Y), and vice versa as "No" (N). If you have any comments on the entry of the indicator or suggest new entries for the indicator, please fill in the column of comments.

**Candidate indicators for the quality evaluation system of single-case diagnosis and treatment of lung cancer**

| **Indicator dimensions** | **The name of the indicator** | **Indicator description** | **Importance (1-9)** | **Feasibility (Y/N)** |
| --- | --- | --- | --- | --- |
| Tier 1 indicators | structural indicators | (a) The provision of all the resources needed for medical services |  |  |
| Tier 1 indicators | process indicators | Various activities in medical services |  |  |
| Tier 1 indicators | outcome indicators | results of medical services |  |  |
| secondary indicators | Personnel indicators | Qualification of healthcare professionals and oncology-related training |  |  |
| secondary indicators | institutional indicators | management systems related to oncology care |  |  |
| secondary indicators | facilities and equipment | Certification of molecular pathology tests |  |  |
| secondary indicators | diagnostic indicators | Pathologic confirmation of diagnosis and clinical staging, among other things |  |  |
| secondary indicators | multidisciplinary treatment | Judging the normality of multidisciplinary diagnosis and treatment |  |  |
| secondary indicators | neoadjuvant therapy | Determining the normality of neoadjuvant therapy |  |  |
| secondary indicators | Surgery | determining the normality of surgical treatment |  |  |
| secondary indicators | adjuvant therapy | determining the normality of adjuvant therapy |  |  |
| secondary indicators | Radiation therapy | Judging the normality of radiation therapy |  |  |
| secondary indicators | systemic treatment | judging the normality of systemic treatment |  |  |
| secondary indicators | palliative care | Checking for over-treatment |  |  |
| secondary indicators | Patient follow-up | Follow-up of patients' survival at 5 years |  |  |
| secondary indicators | Patient-centered | Whether or not patient experience surveys are conducted |  |  |
| secondary indicators | Validity | to determine whether the treatment has been effective |  |  |
| secondary indicators | Security | to determine whether the treatment is safe |  |  |
| secondary indicators | timeliness | Judging the timeliness of treatment |  |  |
| Tertiary indicators | The Tumor Quality Control Leadership Team | The hospital leadership as a quality control leadership team leader, quality control leadership team members should include medical, quality control, clinical, pathology, imaging, nursing, pharmacy and other departmental leaders |  |  |
| Tertiary indicators | physician qualification materials | Physician certification, oncology-related training and continuing medical education |  |  |
| Tertiary indicators | pharmacist qualification materials | Pharmacist certification, oncology pharmacy related training certification and continuing education |  |  |
| Tertiary indicators | Nurse qualification materials | Nurse Registry, Oncology Nursing Training Certification, Annual Continuing Medical Education Credits related to Oncology Nursing |  |  |
| Tertiary indicators | molecular genetic testing qualifications | PCR induction certificates, etc |  |  |
| Tertiary indicators | The adequacy of the management system | consultation and discussion system, antitumor drug hierarchical management system, and antitumor drug expansive application management system |  |  |
| Tertiary indicators | Functional inspector records | In principle, one quality control check per month |  |  |
| Tertiary indicators | internal departmental quality control records | Records of quality control inspections in the department of lung cancer-related diagnosis and treatment |  |  |
| Tertiary indicators | Oncology Drug Prescription Review | Oncology drugs special prescription review in principle once a week, can be appropriately relaxed to once a month |  |  |
| Tertiary indicators | Molecular Pathology Quality Certification | molecular pathology examination qualification or quality certification report |  |  |
| Tertiary indicators | Pathologic confirmation of the diagnosis | Is the diagnosis pathologically confirmed prior to treatment |  |  |
| Tertiary indicators | organization subtype determination | whether the tissue subtype is reported |  |  |
| Tertiary indicators | molecular typing judgment | whether molecular typing is reported |  |  |
| Tertiary indicators | Clinical staging assessment | Whether a clinical staging assessment was performed prior to treatment |  |  |
| Tertiary indicators | whether the clinical staging assessment was correct |  |  |  |
| Tertiary indicators | whether or not multidisciplinary treatment (MDT) discussions were held | three or more departments involved in directing diagnosis or treatment |  |  |
| Tertiary indicators | multidisciplinary discussion of the reasonableness of the program |  |  |  |
| Tertiary indicators | the consistency of the results of the multidisciplinary discussions with the actual treatment program |  |  |  |
| Tertiary indicators | The neoadjuvant therapy program is complete and standardized | treatment programs, treatment expectations, etc. |  |  |
| Tertiary indicators | whether the neoadjuvant therapy program is justified | platinum-containing chemotherapy ± PD1/PD-L1 monoclonal antibodies, etc |  |  |
| Tertiary indicators | whether or not post-neoadjuvant clinical staging was performed |  |  |  |
| Tertiary indicators | Whether or not post-neoadjuvant pathologic staging was performed |  |  |  |
| Tertiary indicators | whether or not a pathology mitigation evaluation was performed |  |  |  |
| Tertiary indicators | whether the surgical plan is standardized | proposed procedure, etc |  |  |
| Tertiary indicators | the reasonableness of the surgical program | Surgical resection of stage I-II non-small cell lung cancer, et al |  |  |
| Tertiary indicators | Preoperative VTE risk assessment |  |  |  |
| Surgery | preoperative bleeding risk assessment |  |  |  |
| Tertiary indicators | Complete and standardized surgical records | Date and time of the operation, preoperative diagnosis, name of the operation, postoperative diagnosis, medical personnel participating in the operation, method of anesthesia and anesthesia personnel, medication used before anesthesia and during the operation, blood transfusion, surgical procedure, size and appearance of the tumor, invasion of lymph nodes and tissues |  |  |
| Tertiary indicators | Lung cancer resection with or without lymph node dissection |  |  |  |
| Tertiary indicators | Adequacy of lymph node dissection | Number of mediastinal lymph node dissection ≥ 3 stations, and |  |  |
| Tertiary indicators | postoperative pathology report standardization | Histological type, subtype, tumor size, extent of tumor invasion (e.g., involvement of the pleura of the visceral wall layer, etc.), high-risk factors (e.g., choroidal tumor embolus, etc.), margins, and lymph node metastasis, etc. Immunohistochemistry and/or special stains are required, if necessary. Surgical specimens after neoadjuvant therapy need to be evaluated for response to treatment |  |  |
| Tertiary indicators | Whether postoperative pTN staging evaluations were performed |  |  |  |
| Tertiary indicators | Complementary treatment programs regulated | Treatment regimens, routes of administration, dosages, treatment cycles, etc. |  |  |
| Tertiary indicators | whether the adjunctive therapy program is reasonable | Stage IA NSCLC patients receiving postoperative adjuvant therapy (negative); Stage II NSCLC patients receiving postoperative synchronized radiotherapy (negative); Stage IIB NSCLC patients receiving postoperative platinum-containing two-agent adjuvant chemotherapy; Stage II-III NSCLC receiving postoperative adjuvant therapy; Stage II-III EGFR-mutant NSCLC patients receiving postoperative adjuvant treatment with TKI. PD-L1 ≥1% in patients with stage II-III non-small cell lung cancer receiving postoperative atalizumab adjuvant therapy, etc |  |  |
| Tertiary indicators | the adequacy of the adjuvant therapy cycle |  |  |  |
| Tertiary indicators | The radiotherapy plan is complete and standardized | The purpose of radiation therapy (palliative or radical), the technique of radiation therapy, the definition of the target area, the dose of radiation therapy and the number of radiation treatments were recorded |  |  |
| Tertiary indicators | the reasonableness of the radiotherapy program | Stereotactic radiotherapy for non-small cell lung cancer patients of stage IA and IB who are not suitable for surgery; radiotherapy or synchronous radiotherapy or sequential radiotherapy for non-small cell lung cancer patients of stage IIA and IIB who are not suitable for surgery; radical synchronous radiotherapy or sequential radiotherapy for non-small cell lung cancer patients of stage IIIA, IIIB and IIIC who are not suitable for surgery and have a PS=0~1 |  |  |
| Tertiary indicators | Radiotherapy records are standardized | radiotherapy techniques, target area definition, radiotherapy dose and number of radiotherapy sessions |  |  |
| Tertiary indicators | radiotherapy dose completion rate | total actual radiotherapy dose/total planned radiotherapy dose |  |  |
| Tertiary indicators | Whether or not an evaluation of the efficacy of radiation therapy was performed |  |  |  |
| Tertiary indicators | The systematic treatment plan is complete and standardized | patient diagnosis, drug regimen, dosage, route of administration |  |  |
| Tertiary indicators | Systemic treatment orders/prescriptions are complete and standardized | generic name of the drug, dosage, route of administration, etc. |  |  |
| Tertiary indicators | Whether the systemic treatment program is reasonable | Patients with driver gene-positive non-small cell lung cancer receiving targeted therapy; patients with driver gene-negative or undocumented non-small cell lung cancer receiving targeted therapy; PD-L1 TC ≥ 50% or IC ≥ 10% required for treatment with atalizumab, etc |  |  |
| Tertiary indicators | A record of pre-chemotherapy physical status scores |  |  |  |
| Tertiary indicators | pain assessment prior to chemotherapy |  |  |  |
| Tertiary indicators | Whether a systematic evaluation of the efficacy of treatment was conducted |  |  |  |
| Tertiary indicators | chemotherapy within 14 days of end-of-life | Negative indicator, the lower the better |  |  |
| Tertiary indicators | Lung cancer patients completing follow-up within 5 years of treatment | Whether or not the patient's survival status is recorded |  |  |
| Tertiary indicators | Conducting patient experience surveys | Focusing on the patient experience and the quality and level of medical services provided |  |  |
| Tertiary indicators | Evaluation of therapeutic efficacy of antitumor drugs | complete remission, partial remission, no remission |  |  |
| Tertiary indicators | Evaluation of the efficacy of radiotherapy | complete remission, partial remission, no remission |  |  |
| Tertiary indicators | Whether the surgery was R0 resection |  |  |  |
| Tertiary indicators | Hospitalized deaths of patients undergoing elective surgery |  |  |  |
| Tertiary indicators | the occurrence of surgical complications | Except for pre-existing disease comorbidities at the time of admission, including subcutaneous emphysema, pulmonary atelectasis, pleural hemorrhage, pulmonary edema, cardiac arrhythmia, pneumonia, pulmonary infection, respiratory failure, bronchopleural fistula, celiac disease, pulmonary embolism, cardiac failure, cerebral infarction, myocardial infarction, neurologic injury, persistent air leakage, persistent coughing, electrolyte disorders, incisional infections or delayed healing, neurologic complications, and so forth |  |  |
| Tertiary indicators | serious adverse reactions to antitumor drugs | Grade 3-4 adverse reactions |  |  |
| Tertiary indicators | Time from first diagnosis to first treatment | for lung cancer patients whose first diagnosis and first treatment occurred in the same hospital |  |  |

**Request for Expert Opinion**

**Do you think any important indicators are missing? If so, please fill in the following.**

| **The name of the indicator** | **Indicator description** | **Importance**  **（1-9）** | **feasibility**  **（Y/N）** |
| --- | --- | --- | --- |
|  |  |  |  |
|  |  |  |  |
|  |  |  |  |
|  |  |  |  |
|  |  |  |  |
|  |  |  |  |
|  |  |  |  |

**Are there any important indicators or descriptions of indicators that need to be revised or added? If so, please fill in the following.**

**Part III. Questionnaire on the level of authority of experts**

**Please select your level of familiarity with the content of the indicator in the table below and tick the appropriate box.**

| **1. Lack of understanding** | **2. Less familiar** | **3. General** | **4. More familiar with** | **5. Be familiar with** |
| --- | --- | --- | --- | --- |
|  |  |  |  |  |

**In the table below, please select the extent to which each of the bases influenced your rating judgment and put a tick in the appropriate box.**

| **basis of judgment** | **The extent of the impact** | | |
| --- | --- | --- | --- |
| **large** | **in** | **Small** |
| Theoretical analysis |  |  |  |
| work experience |  |  |  |
| knowledge of domestic and international counterparts |  |  |  |
| Intuition |  |  |  |
