# Supplementary material for: Developing a quality evaluation indicator system for lung cancer diagnosis and treatment: a modified delphi method study
Source: Research Square preprint supplement (doi:10.21203/rs.3.rs-6166642/v1), 2025-04-17
Supplement: Supplementary file 2 [file d9639f621ff80ceaf4ccd410.docx]

**Second Round Delphi Expert Consultation Questionnaire**

**Construction of a Quality Evaluation Indicator System for Lung Cancer Diagnosis and Treatment in China**

**Distinguished expert,**

Thank you very much for taking time out of your busy schedule to participate in our current round of expert consultations.

First of all, thank you for your support and assistance during the first round of the expert consultation. In the first round of questionnaire survey, we distributed 27 questionnaires and collected 25 valid questionnaires. Based on the importance ratings of each indicator by the experts, we revised the "China's lung cancer single disease diagnosis and treatment quality evaluation index system" by combining the experts' opinions and suggestions on the indexes, and formed the latest index system.

This is the second round of expert consultation on "China's lung cancer single-disease diagnosis and treatment quality evaluation index system", which is expected to establish a "China's lung cancer single-disease diagnosis and treatment quality evaluation index system" with good applicability through the scoring of each index by experts in related fields and the corresponding suggestions on the deletion and modification of the indexes. Indicator system".

This questionnaire consists of three aspects: Part I, the 2nd round of consultation form of China's lung cancer single disease diagnosis and treatment quality evaluation index system; Part II, the degree of authority of experts; Part III, the feedback of the results of the first round of expert consultation.

In view of your achievements in related fields, we would like to invite you to participate in this second round of expert consultation, and hope to take up some of your time to fill out this questionnaire, thank you for your participation! Sincerely hope that you can complete the survey within one week (before November 1), the researchers will analyze your comments and give feedback, all of your information will be kept strictly confidential, look forward to your response.

If you have any questions, please do not hesitate to contact: Mr. Liming Shi, e-mail.[17287277@qq.com](mailto:17287277@qq.com) Cell phone: 18612113950.

National Cancer Center

Office of Cancer Diagnosis and Treatment Quality Control

October 24, 2024

**Part I. China's lung cancer single-disease diagnosis and treatment quality evaluation system solicitation form**

Please read the following materials before filling out the form.

1. "China's lung cancer single-disease treatment quality evaluation index system" starts from the basic evaluation framework of structural, process and outcome indexes, and mainly considers the quality of lung cancer treatment, constructing 3 first-level indexes, 16 second-level indexes and 56 third-level indexes. According to the results of the first round of expert consultation, no indicators were deleted, 2 tertiary indicators were modified and 5 new tertiary indicators were added.

2. Each indicator is considered in terms of its "importance", which is rated on a 9-point scale (1-9), with 1 indicating that the entry is very unimportant for measuring the quality of care and 9 indicating that it is very important. The visual scale is as follows.

1 2 3 4 5 6 7 8 9

Very unimportant. - Very important

3. If you have different opinions on the dimensions and indicators of the indicator system, you can modify the indicators in the table on the right side; if you need to add indicators, please list in the last blank line the indicators that you think are important but we have not mentioned, and rate them accordingly.

**Primary and secondary indicators for evaluating the quality of single-case diagnosis and treatment of lung cancer**

Explanation:① Mean score of significance: the arithmetic mean of 25 experts' ratings is calculated for each indicator; ① Mean score of significance: the arithmetic mean of 25 experts' ratings is calculated for each indicator.

② Please fill in columns E and F with your ratings and suggestions regarding this indicator.

**③ If there is a big difference between your current rating and the summary results of the first round of expert ratings, please fill in the reasons for your rating in column G.**

| **Column A Indicator dimension** | | **Column B Name of indicator** | **Column C Indicator Description** | **Column D Average first round importance score** | **Column E. Materiality (1-9)** | **Column F Revised proposal** | **Column G Rationale for rating** |
| --- | --- | --- | --- | --- | --- | --- | --- |
| Tier 1 indicators | | structural indicators | (a) The provision of all the resources needed for medical services | 8.2 |  |  |  |
| Tier 1 indicators | | process indicators | Various activities in medical services | 8.5 |  |  |  |
| Tier 1 indicators | | outcome indicators | results of medical services | 8.6 |  |  |  |
| secondary indicators | Structure Quality | Personnel indicators | Qualification of healthcare professionals and oncology-related training | 8.5 |  |  |  |
| secondary indicators | institutional indicators | management systems related to oncology care | 8.4 |  |  |  |
| secondary indicators | facilities and equipment | Certification of molecular pathology tests | 8.4 |  |  |  |
| secondary indicators | process quality | diagnostic indicators | Pathologic confirmation of diagnosis and clinical staging, among other things | 8.8 |  |  |  |
| secondary indicators | multidisciplinary treatment | Judging the normality of multidisciplinary diagnosis and treatment | 8.6 |  |  |  |
| secondary indicators | neoadjuvant therapy | Determining the normality of neoadjuvant therapy | 8.3 |  |  |  |
| secondary indicators | Surgery | determining the normality of surgical treatment | 8.7 |  |  |  |
| secondary indicators | adjuvant therapy | judging the normality of adjuvant therapy | 8.6 |  |  |  |
| secondary indicators | Radiation therapy | Judging the normality of radiation therapy | 8.4 |  |  |  |
| secondary indicators | systemic treatment | judging the normality of systemic treatment | 8.7 |  |  |  |
| secondary indicators | palliative care | Checking for over-treatment | 8.1 |  |  |  |
| secondary indicators | Patient follow-up | Follow-up of patients' survival at 5 years | 8.6 |  |  |  |
| secondary indicators | Patient-centered | Whether or not patient experience surveys are conducted | 7.5 |  |  |  |
| secondary indicators | Results Quality | Validity | to determine whether the treatment has been effective | 8.5 |  |  |  |
| secondary indicators | Security | to determine whether the treatment is safe | 8.6 |  |  |  |
| secondary indicators | timeliness | Judging the timeliness of treatment | 8.0 |  |  |  |

**Lung cancer diagnosis and treatment quality evaluation of three-level indicators**

Explanation:① Mean score of significance: the arithmetic mean of 25 experts' ratings is calculated for each indicator; ① Mean score of significance: the arithmetic mean of 25 experts' ratings is calculated for each indicator.

② Please fill in columns E and F with your ratings and suggestions regarding this indicator.

**③ If there is a big difference between your current rating and the summary results of the first round of expert ratings, please fill in the reasons for your rating in column G.**

| **Column A. Secondary indicators** | **Column B Tertiary indicators** | **Column C. Description of tertiary indicators** | **Column D Average first round importance score** | **Column E. Materiality (1-9)** | **Column F Revised proposal** | **Column G Rationale for rating** |
| --- | --- | --- | --- | --- | --- | --- |
| Personnel indicators | The Tumor Quality Control Leadership Team | The hospital leadership as a quality control leadership team leader, quality control leadership team members should include medical, quality control, clinical, pathology, imaging, nursing, pharmacy and other departmental leaders | 8.0 |  |  |  |
| Personnel indicators | physician qualification materials | Physician certification, oncology-related training and continuing medical education | 8.3 |  |  |  |
| Personnel indicators | pharmacist qualification materials | Pharmacist certification, oncology pharmacy related training certification and continuing education | 7.9 |  |  |  |
| Personnel indicators | Nurse qualification materials | Nurse Registry Certificate, Oncology Nursing Training Certification, Annual Continuing Medical Education Credits related to Oncology Nursing | 7.8 |  |  |  |
| Personnel indicators | molecular genetic testing qualifications | PCR induction certificates, etc | 8.2 |  |  |  |
| institutional indicators | The adequacy of the management system | consultation and discussion system, antitumor drug hierarchical management system, and antitumor drug expansive application management system | 7.9 |  |  |  |
| institutional indicators | Functional inspector records | In principle, one quality control check per month | 7.6 |  |  |  |
| institutional indicators | internal departmental quality control records | Records of quality control inspections in the department of lung cancer-related diagnosis and treatment | 7.7 |  |  |  |
| institutional indicators | Oncology Drug Prescription Review | Oncology drugs special prescription review in principle once a week, can be appropriately relaxed to once a month | 7.6 |  |  |  |
| facilities and equipment | Molecular Pathology Quality Certification | molecular pathology examination qualification or quality certification report | 8.3 |  |  |  |
| diagnostic indicators | Pathologic confirmation of the diagnosis | Is the diagnosis pathologically confirmed prior to treatment | 8.5 |  |  |  |
| diagnostic indicators | Organizational subtype determination | whether the tissue subtype is reported | 8.3 |  |  |  |
| diagnostic indicators | molecular typing judgment | whether molecular typing is reported | 8.3 |  |  |  |
| diagnostic indicators | Clinical staging assessment | Whether a clinical staging assessment was performed prior to treatment | 8.5 |  |  |  |
| diagnostic indicators | whether the clinical staging assessment was correct | assessing the level of clinical staging | 8.4 |  |  |  |
| multidisciplinary treatment | whether or not multidisciplinary treatment (MDT) discussions were held | three or more departments involved in directing diagnosis or treatment | 8.0 |  |  |  |
| multidisciplinary treatment | multidisciplinary discussion of the reasonableness of the program | Assessing the level of multidisciplinary care | 8.2 |  |  |  |
| multidisciplinary treatment | the consistency of the results of the multidisciplinary discussions with the actual treatment program | Implementation of the multidisciplinary diagnostic and treatment program | 8.0 |  |  |  |
| neoadjuvant therapy | The neoadjuvant therapy program is complete and standardized | treatment programs, treatment cycles, etc. | 8.1 |  |  |  |
| neoadjuvant therapy | whether the neoadjuvant therapy program is justified | platinum-containing chemotherapy ± PD1/PD-L1 monoclonal antibodies, etc | 8.0 |  |  |  |
| neoadjuvant therapy | whether or not post-neoadjuvant clinical staging was performed | Neoadjuvant therapy normative | 8.2 |  |  |  |
| neoadjuvant therapy | Whether or not post-neoadjuvant pathologic staging was performed | Neoadjuvant therapy normative | 8.0 |  |  |  |
| neoadjuvant therapy | whether or not a pathology mitigation evaluation was performed | Neoadjuvant therapy normative | 8.2 |  |  |  |
| Surgery | The surgical plan is complete and standardized | Preoperative diagnosis, indications for surgery, proposed surgical procedure, proposed mode of anesthesia, and precautions to be taken | 8.2 |  |  |  |
| Surgery | the reasonableness of the surgical program | Surgical resection of stage I-II non-small cell lung cancer, et al | 8.6 |  |  |  |
| Surgery | Preoperative VTE risk assessment | preoperative assessment of normality | 8.0 |  |  |  |
| Surgery | preoperative bleeding risk assessment | preoperative assessment of normality | 8.0 |  |  |  |
| Surgery | Complete and standardized surgical records | Date and time of the operation, preoperative diagnosis, name of the operation, postoperative diagnosis, medical personnel participating in the operation, method of anesthesia and anesthesia personnel, medication used before anesthesia and during the operation, blood transfusion, surgical procedure, size and appearance of the tumor, invasion of lymph nodes and tissues | 8.3 |  |  |  |
| Surgery | Whether lymph node dissection is performed for resection of invasive lung cancer (sampling) | Normality of lymph node dissection for lung cancer resection | 8.3 |  |  |  |
| Surgery | adequacy of lymph node dissection (sampling) | Invasive lung cancer providing information on lymph nodes at 3 or more stations | 8.2 |  |  |  |
| Surgery | postoperative pathology report standardization | Histological type, subtype, tumor size, extent of tumor invasion (e.g., involvement of the pleura of the visceral wall layer, etc.), high-risk factors (e.g., choroidal tumor embolus, etc.), margins, and lymph node metastasis, etc. Immunohistochemistry and/or special stains are required, if necessary. Surgical specimens after neoadjuvant therapy need to be evaluated for response to treatment | 8.6 |  |  |  |
| Surgery | Whether postoperative pTN staging evaluations were performed | postoperative pathology normality | 8.7 |  |  |  |
| adjuvant therapy | Complementary treatment programs regulated | treatment programs, treatment cycles, etc. | 8.4 |  |  |  |
| adjuvant therapy | whether the adjunctive therapy program is reasonable | Stage IA NSCLC patients receiving postoperative adjuvant therapy (negative); Stage II NSCLC patients receiving postoperative synchronized radiotherapy (negative); Stage IIB NSCLC patients receiving postoperative platinum-containing two-agent adjuvant chemotherapy; Stage II-III NSCLC receiving postoperative adjuvant therapy; Stage II-III EGFR-mutant NSCLC patients receiving postoperative adjuvant treatment with TKI. PD-L1 ≥1% in patients with stage II-III non-small cell lung cancer receiving postoperative atalizumab adjuvant therapy, etc | 8.1 |  |  |  |
| adjuvant therapy | the adequacy of the adjuvant therapy cycle | Adequacy of complementary therapies | 8.1 |  |  |  |
| Radiation therapy | The radiotherapy plan is complete and standardized | The purpose of radiation therapy (palliative or radical), the technique of radiation therapy, the definition of the target area, the dose of radiation therapy and the number of radiation treatments were recorded | 8.2 |  |  |  |
| Radiation therapy | the reasonableness of the radiotherapy program | Stereotactic radiotherapy for non-small cell lung cancer patients of stage IA and IB who are not suitable for surgery; radiotherapy or synchronous radiotherapy or sequential radiotherapy for non-small cell lung cancer patients of stage IIA and IIB who are not suitable for surgery; radical synchronous radiotherapy or sequential radiotherapy for non-small cell lung cancer patients of stage IIIA, IIIB and IIIC who are not suitable for surgery and have a PS=0~1 | 8.2 |  |  |  |
| Radiation therapy | Radiotherapy records are standardized | radiotherapy techniques, definition of target areas, dose and number of radiotherapy sessions, start and end times of radiotherapy | 8.2 |  |  |  |
| Radiation therapy | radiotherapy dose completion rate | total actual radiotherapy dose/total planned radiotherapy dose | 8.2 |  |  |  |
| Radiation therapy | whether radiotherapy is evaluated for side effects | Radiotherapy normative | Added |  |  |  |
| Radiation therapy | Whether or not an evaluation of the efficacy of radiation therapy was performed | Radiotherapy normative | 8.3 |  |  |  |
| systemic treatment | The systematic treatment plan is complete and standardized | treatment regimens, dosages, routes of administration, treatment intervals, etc. | 8.5 |  |  |  |
| systemic treatment | Systemic treatment orders/prescriptions are complete and standardized | drug generic name, dosage, route of administration, order of administration (if applicable) | 8.4 |  |  |  |
| systemic treatment | Whether the systemic treatment program is reasonable | Patients with driver gene-positive non-small cell lung cancer receiving targeted therapy; patients with driver gene-negative or undocumented non-small cell lung cancer receiving targeted therapy; PD-L1 TC ≥ 50% or IC ≥ 10% required for treatment with atalizumab, etc | 8.5 |  |  |  |
| systemic treatment | A record of pre-chemotherapy physical status scores | normative nature of chemotherapy-related assessments | 8.4 |  |  |  |
| systemic treatment | whether chemotherapy is assessed for pain | normative nature of chemotherapy-related assessments | 7.8 |  |  |  |
| systemic treatment | whether chemotherapy is evaluated for toxicity | normative nature of chemotherapy-related assessments | Added |  |  |  |
| systemic treatment | Whether a systematic evaluation of the efficacy of treatment was conducted | chemotherapy normality | 8.2 |  |  |  |
| palliative care | chemotherapy within 14 days of end-of-life | Negative indicator, the lower the better | 7.8 |  |  |  |
| Patient follow-up | Lung cancer patients completing follow-up within 5 years of treatment | Whether or not the patient's survival status is recorded | 8.2 |  |  |  |
| Patient follow-up | MDT implementation | Whether or not MDT implementation is followed up | Added |  |  |  |
| Patient-centered | Conducting patient experience surveys | Focusing on the patient experience and the quality and level of medical services provided | 7.8 |  |  |  |
| Patient-centered | Nutritional risk screening of hospitalized patients prior to antitumor therapy | Anti-tumor treatments include surgery, radiation and medication | Added |  |  |  |
| Validity | Whether the surgery was R0 resection | difficult surgeries such as sleeve resections | 8.7 |  |  |  |
| Validity | Evaluation of the efficacy of radiotherapy | complete remission, partial remission, no remission | 8.2 |  |  |  |
| Validity | Evaluation of therapeutic efficacy of antitumor drugs | complete remission, partial remission, no remission | 8.1 |  |  |  |
| Security | in-hospital deaths of patients undergoing elective surgery | assessing the safety of surgery | 8.6 |  |  |  |
| Security | the occurrence of surgical complications | Except for pre-existing disease comorbidities at the time of admission, including subcutaneous emphysema, pulmonary atelectasis, pleural hemorrhage, pulmonary edema, cardiac arrhythmia, pneumonia, pulmonary infection, respiratory failure, bronchopleural fistula, celiac disease, pulmonary embolism, cardiac failure, cerebral infarction, myocardial infarction, neurologic injury, persistent air leakage, persistent coughing, electrolyte disorders, incisional infections or delayed healing, neurologic complications, and so forth | 8.5 |  |  |  |
| Security | serious adverse reactions to antitumor drugs | Grade 3-4 adverse reactions | 8.3 |  |  |  |
| Security | Serious adverse reactions to radiation therapy | Grade 3-4 adverse reactions | Added |  |  |  |
| timeliness | Time from first diagnosis to first treatment | for lung cancer patients whose first diagnosis and first treatment occurred in the same hospital | 8.1 |  |  |  |

**Do you think any important indicators are missing? If so, please fill in the following table.**

| **The name of the indicator** | **Indicator description** | **Importance**  **（1-9）** | **Your reasons for adding this indicator** |
| --- | --- | --- | --- |
|  |  |  |  |
|  |  |  |  |
|  |  |  |  |
|  |  |  |  |
|  |  |  |  |
|  |  |  |  |
|  |  |  |  |

**Part II. Questionnaire on the level of authority of experts**

**Your Name.**

**Please select your level of familiarity with the content of the indicator in the table below and tick the appropriate box.**

| **1. Not understanding** | **2. Less familiar** | **3. General** | **4. More familiar with** | **5. Be familiar with** |
| --- | --- | --- | --- | --- |
|  |  |  |  |  |

**In the table below, please select the extent to which each of the bases influenced your rating judgment and put a tick in the appropriate box.**

| **basis of judgment** | **The extent of the impact** | | |
| --- | --- | --- | --- |
| **large** | **in** | **Small** |
| Theoretical analysis |  |  |  |
| work experience |  |  |  |
| knowledge of domestic and international counterparts |  |  |  |
| Intuition |  |  |  |

**Part III Summary of the results of the first round expert advice**

**Description**

This section does not require you to fill in anything, and we would like to provide you with a summary of the results of the first round of expert consultation for your review.

**I. Indicator inclusion exclusion criteria**

Indicator deletion rules, while the following conditions are not met.

1. The arithmetic mean of the importance of the candidate indicator is ≥ 7.0.
2. The coefficient of variation of the candidate indicator is ≤ 0.2.
3. Frequency of experts with an importance rating of "7-9" for candidate indicators ≥ 70%.

If an expert suggests that a new indicator needs to be added or adjusted, the solution is decided by the research team after a joint discussion.

**II. Deletion of indicators**

Based on the results of the first round of expert consultation, the arithmetic mean of the significance of all indicators was greater than 7.5 and no indicators were deleted.

**iii. revision of indicators**

Based on the results of the first round of expert consultation, the original two tertiary indicators have been adapted to the current clinical situation, specifically.

1. The indicator for whether or not lymph node dissection was performed for lung cancer resection was adjusted to "whether or not lymph node dissection was performed for invasive lung cancer resection (sampling)".
2. The indicator description of the adequacy of lymph node dissection was adjusted to read "Whether or not lymph node information is provided at more than 3 stations for resection of invasive lung cancer".

**IV. Additional indicators**

Five new tertiary indicators have been added as a result of the first round of expert consultation, including.

1. Whether chemotherapy is evaluated for toxicity
2. whether radiotherapy is evaluated for side effects
3. Whether or not MDT implementation follow-up is performed
4. Nutritional risk screening of hospitalized patients prior to antitumor therapy
5. Serious adverse reactions to radiation therapy
